# Supplementary material for: Achieving Persistent Luminescence Performance Based on the Cation-Tunable Trap Distribution
Source: MDPI journal article supplement (doi:10.3390/ma15249083), 2022-12-19
Supplement: s1 [file s1]

## Supplementary materials

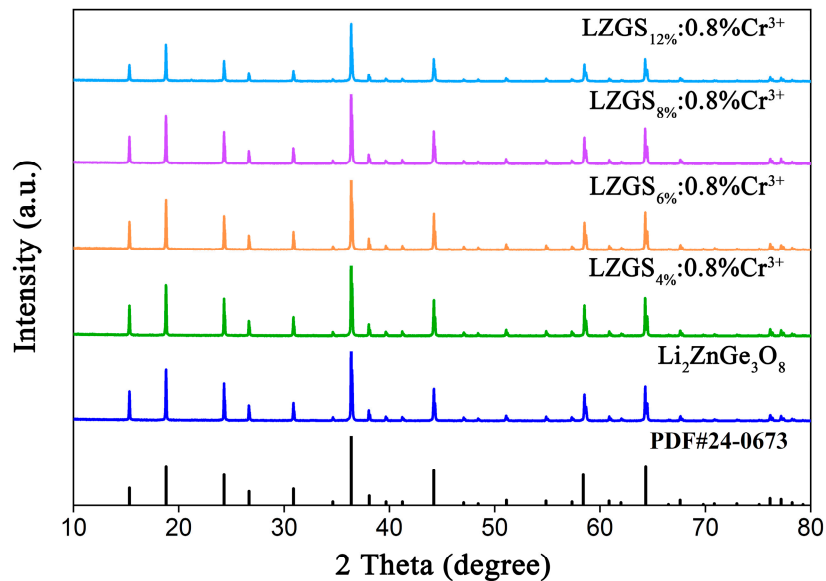

Figure S1. The XRD of LZGS<sub>x</sub>O:0.8%Cr<sup>3+</sup> ( $x = 0-12\%$ ).

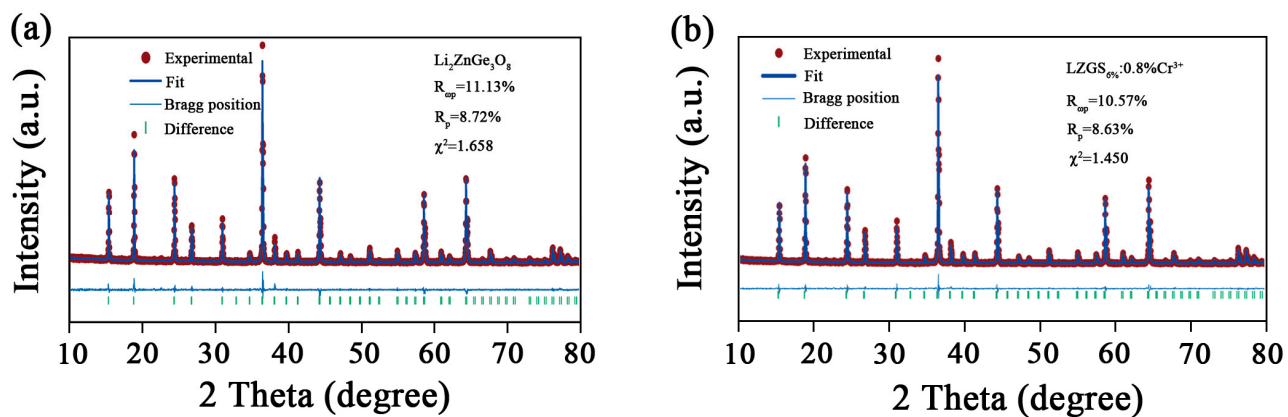

Figure S2. The Rietveld refinement results of (a) LZGO and (b) LZGS<sub>6%</sub>O:0.8%Cr<sup>3+</sup>.

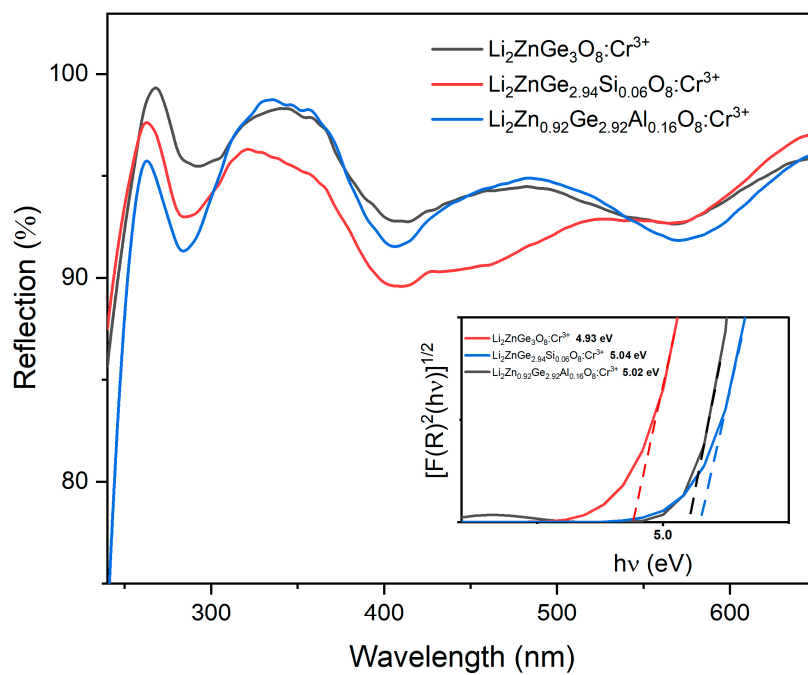

**Figure S3.** The DRs of LZGA: Cr, LZGS: Cr and LZGO: Cr. Inset: the bandgap width of LZGA: Cr, LZGS: Cr and LZGO: Cr.

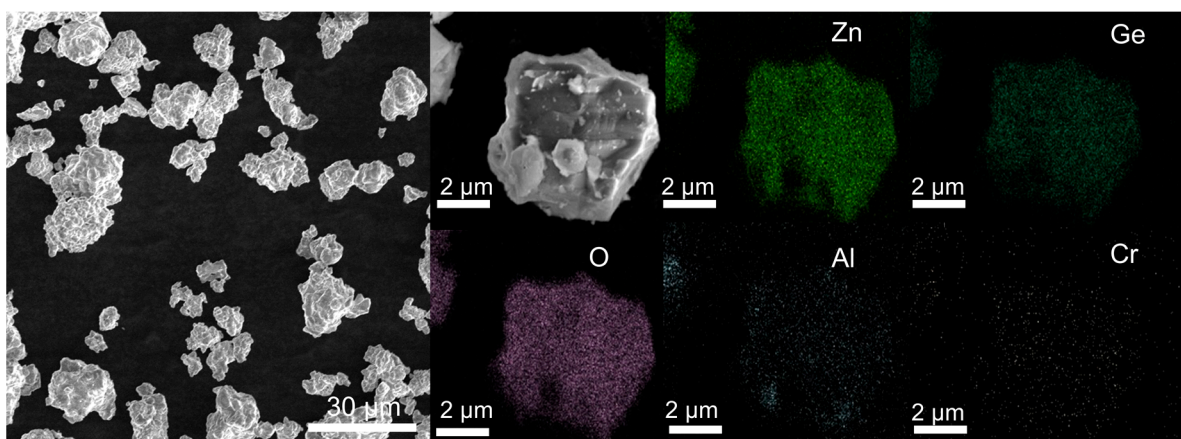

**Figure S4.** Elemental mapping analysis and SEM of LZGAO:0.8%Cr<sup>3+</sup>.

**Table S1.** Refined crystallographic data of LZGS: Cr (y = 0-12%)

| <b>y</b>                      | <b>0%</b>                | <b>2%</b> | <b>6%</b> | <b>8%</b> | <b>12%</b> |
|-------------------------------|--------------------------|-----------|-----------|-----------|------------|
| Crystal System                | Cubic                    |           |           |           |            |
| a(Å)=b(Å)=c(Å)                | P4332 (Allows Chirality) |           |           |           |            |
| Cell Volume (Å <sup>3</sup> ) | 550.414                  | 550.300   | 550.259   | 550.287   | 550.317    |
| R <sub>wp</sub> (%)           | 12.6                     | 12.2      | 10.57     | 13.2      | 14.5       |
| R <sub>p</sub> (%)            | 9.0                      | 8.69      | 8.63      | 9.38      | 9.96       |
| $\chi^2$                      | 1.311                    | 1.236     | 1.450     | 1.419     | 1.702      |

**Table S2.** Refined crystallographic data of LZGA: Cr (y = 0-12%)

| <b>z</b>                      | <b>0%</b>                | <b>0.5%</b> | <b>2%</b> | <b>6%</b> | <b>10%</b> |
|-------------------------------|--------------------------|-------------|-----------|-----------|------------|
| Crystal System                | Cubic                    |             |           |           |            |
| a(Å)=b(Å)=c(Å)                | P4332 (Allows Chirality) |             |           |           |            |
| Cell Volume (Å <sup>3</sup> ) | 550.414                  | 550.403     | 550.327   | 550.330   | 550.351    |
| R <sub>wp</sub> (%)           | 12.6                     | 11.9        | 12.0      | 12.4      | 12.7       |
| R <sub>p</sub> (%)            | 9.0                      | 8.64        | 8.73      | 8.69      | 9.11       |
| $\chi^2$                      | 1.311                    | 1.286       | 1.297     | 1.381     | 1.455      |
